# Supplementary material
Source: PubMed Central journal article supplement (PMC7082570)
Supplement: AEM.02347-19-s0001.pdf [file AEM.02347-19-s0001.pdf]

## Supplemental Material

### The cell wall integrity pathway contributes to the early stages of *Aspergillus fumigatus* asexual development

Marina Campos Rocha<sup>a</sup>, João Henrique Tadini Marilhano Fabri<sup>a</sup>, Isabelle Taira Simões<sup>a</sup>,  
Rafael Silva-Rocha<sup>b</sup>, Daisuke Hagiwara<sup>c</sup>, Anderson Ferreira da Cunha<sup>a</sup>, Gustavo Henrique  
Goldman<sup>d</sup>, David Cánovas<sup>e</sup>, Iran Malavazi<sup>a#</sup>

<sup>a</sup>Departamento de Genética e Evolução, Centro de Ciências Biológicas e da Saúde, Universidade Federal de São Carlos, São Carlos, São Paulo, Brazil.

<sup>b</sup>Departamento de Biologia Celular e Molecular, Faculdade de Medicina de Ribeirão Preto, Universidade de São Paulo, Ribeirão Preto, São Paulo, Brazil.

<sup>c</sup>Faculty of Life and Environmental Sciences, University of Tsukuba, Ibaraki, Japan.

<sup>d</sup>Departamento de Ciências Farmacêuticas, Faculdade de Ciências Farmacêuticas de Ribeirão Preto, Universidade de São Paulo, Ribeirão Preto, São Paulo, Brazil.

<sup>e</sup>Department of Genetics, University of Sevilla, Sevilla, Spain.

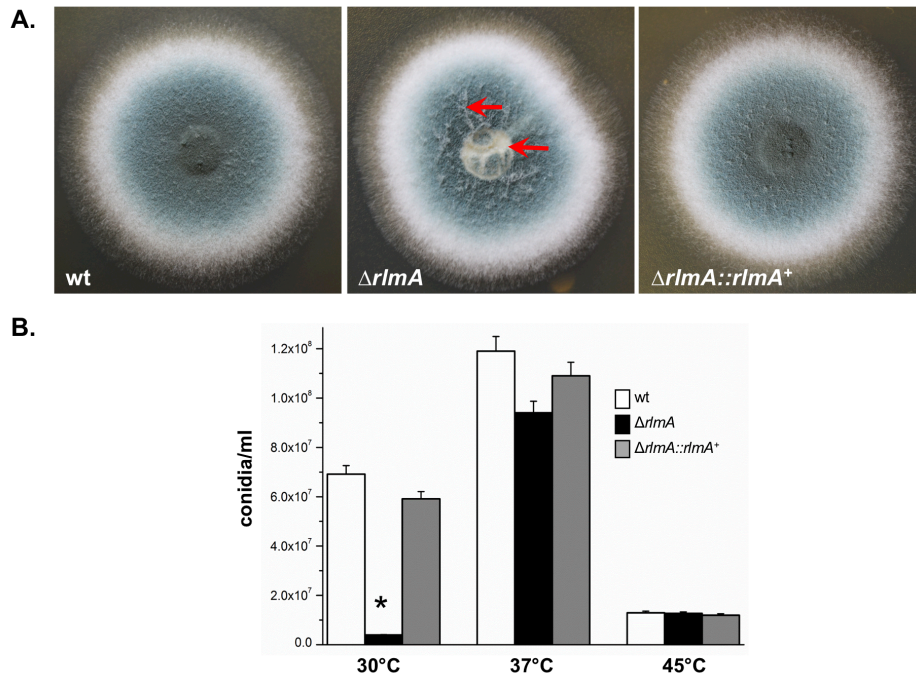

**FIG S1 The  $\Delta rlmA$  mutant presents lower number of conidia and a fluffy-like phenotype.** (A) Radial growth of the wild-type,  $\Delta rlmA$  and  $\Delta rlmA::rlmA^+$  strains on complete solid medium at 30°C.  $1 \times 10^5$  conidia from each strain was inoculated onto the center of a solid YG plate and incubated for five days. Arrows indicate undifferentiated aerial hyphae (fluffy phenotype). (B) The conidia were collected by sampling four 0.5 cm<sup>2</sup> agar in 0.01% Tween 20 and counted in a Neubauer chamber. The results are the average  $\pm$  SD (n = 4; \* $p \leq 0.001$ ).

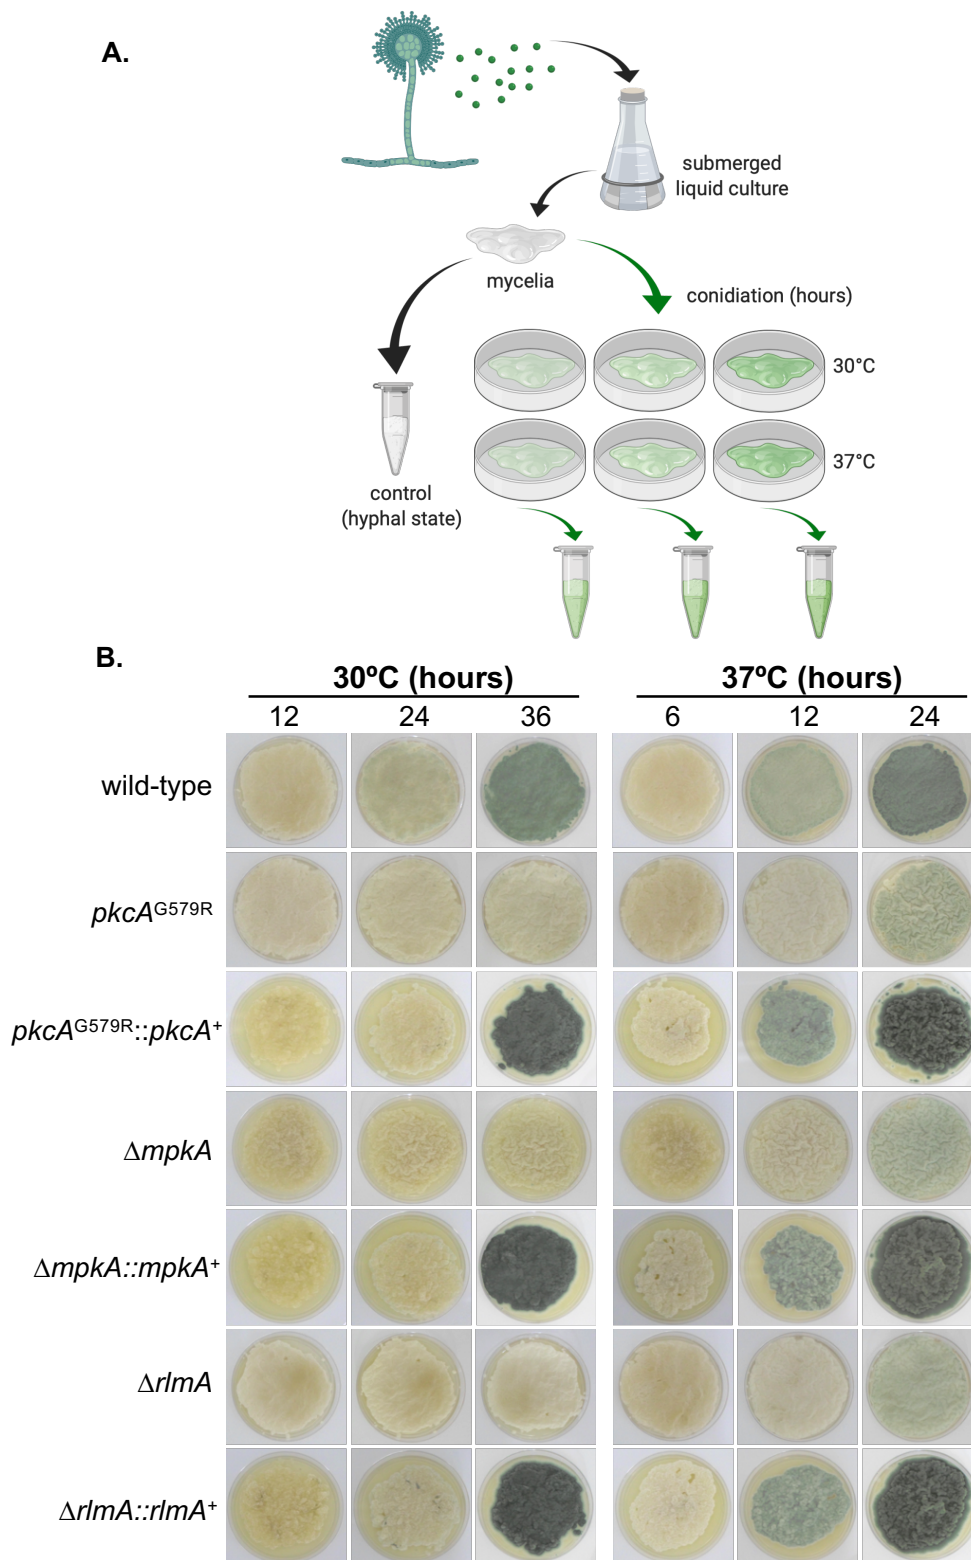

**FIG S2 The  $\Delta rlmA$  mutant presents defective conidiation during synchronized asexual differentiation.** (A) Scheme of the conditions used to induce synchronized asexual differentiation. Vegetative mycelia grown for 18 hours in liquid MM supplemented with 0.1% yeast extract (37°C) were spread onto solid media and incubated under air-exposed conditions for the required number of hours in each experiment at 30°C or 37°C (green

arrows). The whole cells undergoing asexual differentiation were harvested from the plates at designated time points after transfer and used in the experiments. Vegetative mycelia (hyphal state) served as control. Created with BioRender.com. (B) Delayed conidiation of the CWI pathway mutants. The time (hours) indicates the growth at each temperature after the mycelium was transferred from the liquid-submerged synchronized culture to the air interface onto solid medium.



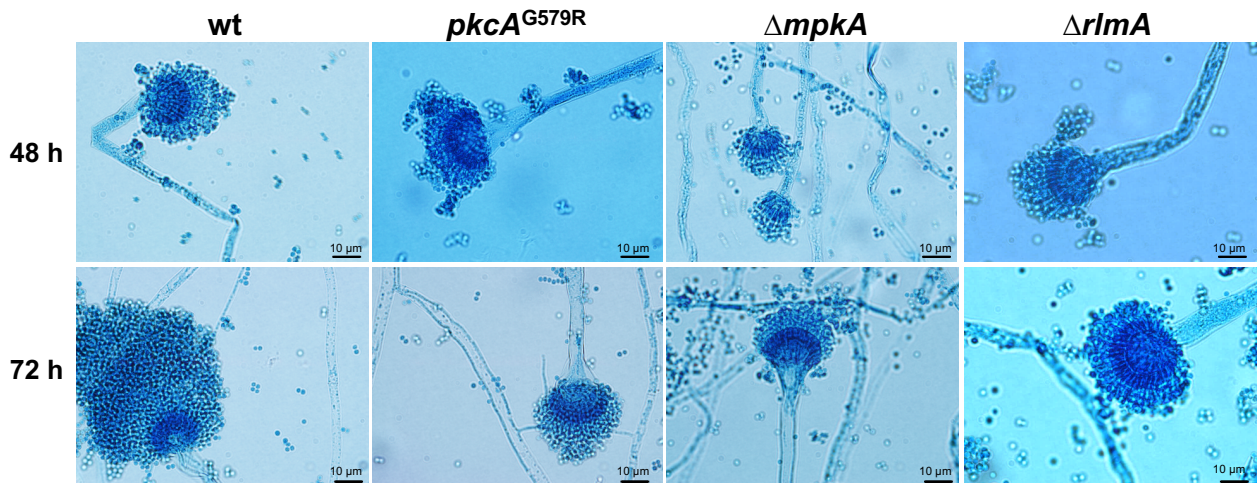

**FIG S3** Conidiophore morphology of the wild-type, *pkcA*<sup>G579R</sup>,  $\Delta rlmA$  and  $\Delta mpkA$  mutant strains was analyzed after 48 and 72 hours of cultivation on solid YG medium. Coverslips containing the adhered conidiophores were stained with lactophenol cotton blue and inspected under bright field microscope (100 $\times$  magnification).

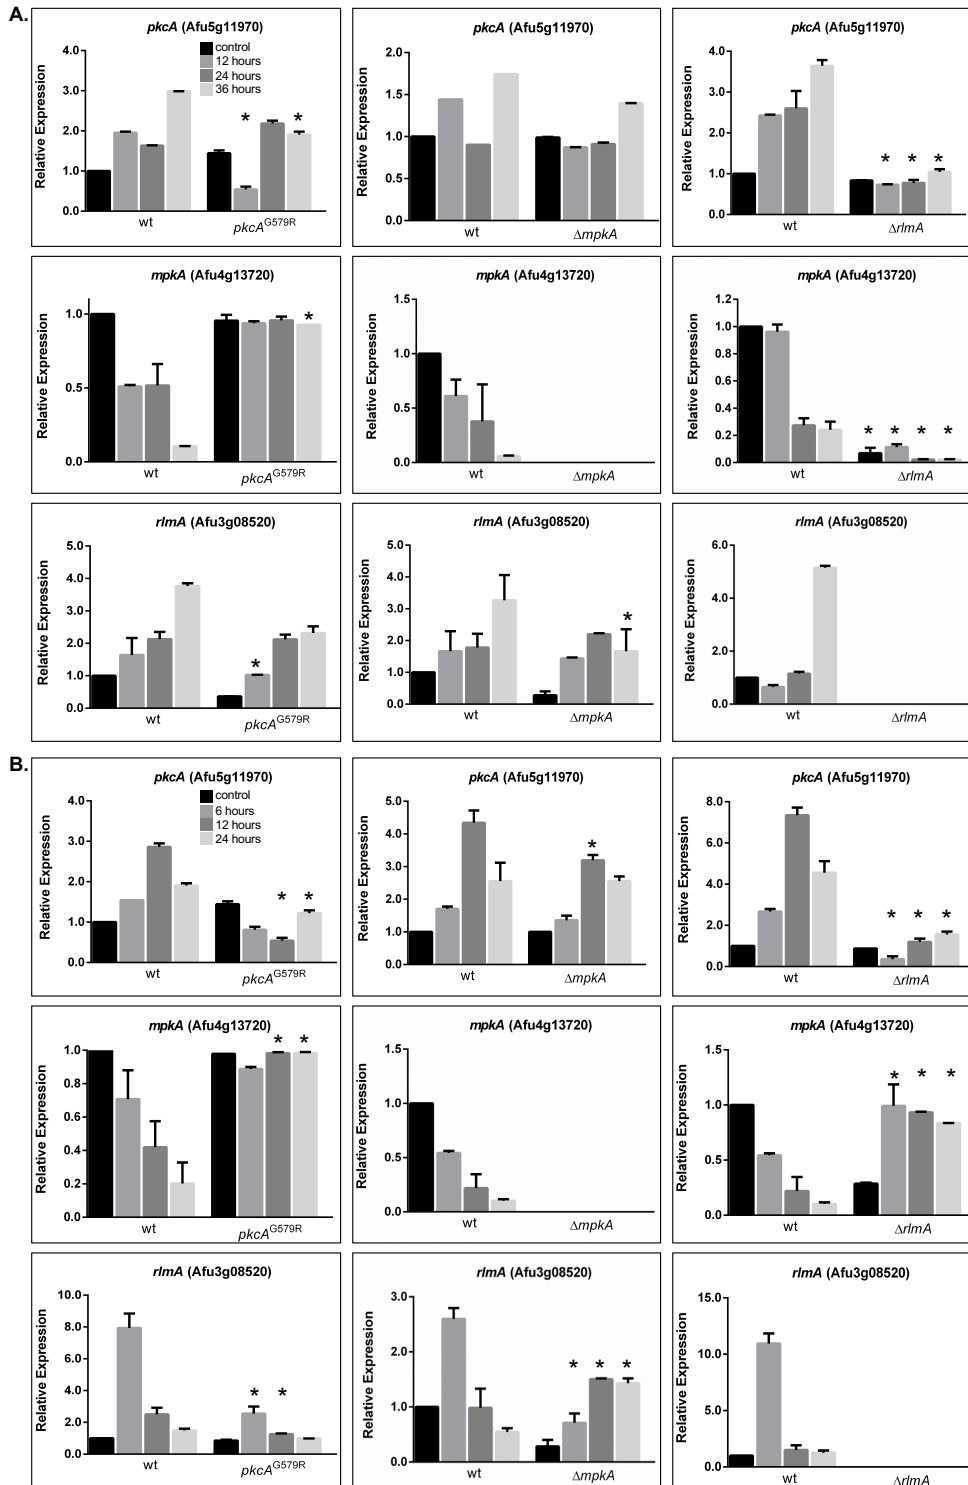

**FIG S4** Asexual differentiation is accompanied by up-regulation of the CWIP genes. Total RNA was isolated from the strains subjected to synchronized asexual differentiation at 30°C (A) and 37°C (B). cDNA was obtained and used in RT-qPCR. The fold increase in each strain represents the normalized mRNA abundance relative to the wild-type strain. The data represent the average value of at least three independent experiments (with 2 technical repetitions each). \* $p \leq 0.05$  (One-Way ANOVA).

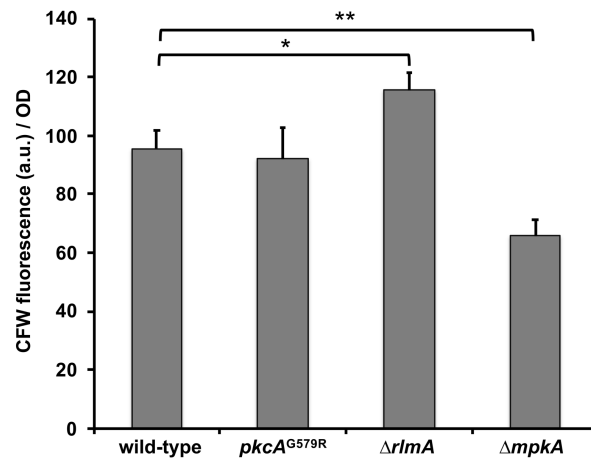

**FIG S5 Chitin detection during growth on solid media.** Strains were grown on solid media for 18-30 hours at 37°C and CFW was used to quantify chitin by fluorescence detection. The data shown are the slope of the plot of CFW fluorescence against biomass (measured as absorbance at 600 nm). The results are the average  $\pm$  SE ( $n = 4$ ,  $*p \leq 0.02$  or  $**p \leq 0.002$  *t*-test).

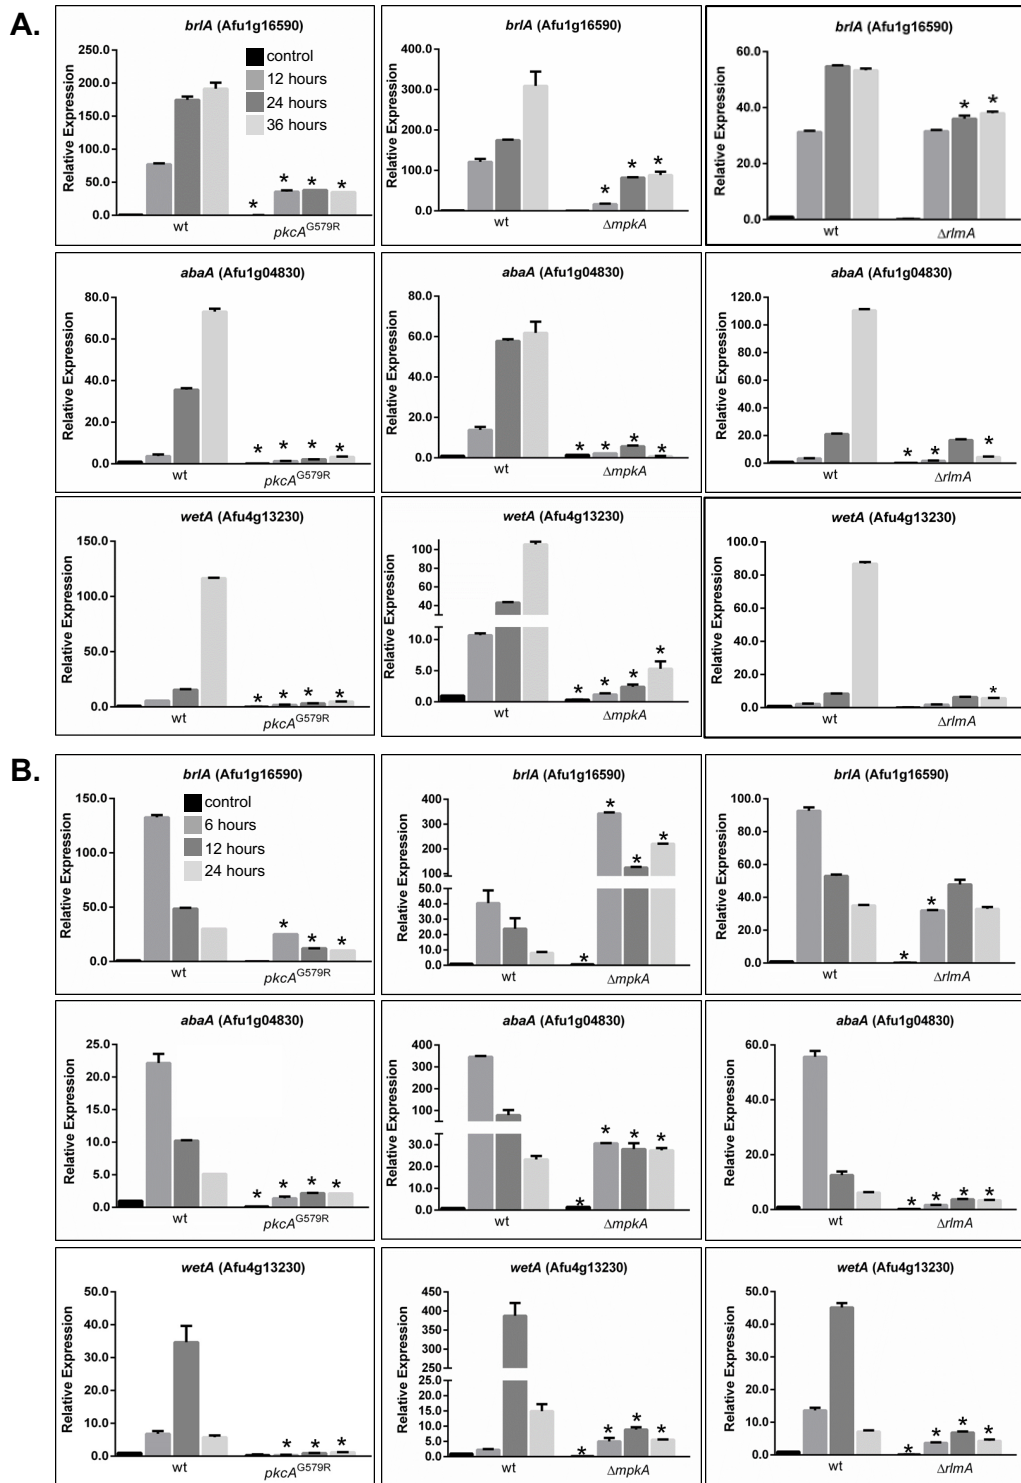

**FIG S6.** mRNA abundance of genes encoding the central regulators of asexual development is lower in the CWIP mutants. Total RNA was isolated from the strains subjected to synchronized asexual differentiation at 30°C (A) or 37°C (B). cDNA was obtained and used in RT-qPCR. The fold increase in each strain represents the normalized mRNA abundance relative to the wild-type strain. The data represent the average value of at least three independent experiments (with 2 technical repetitions each). \* $p \leq 0.05$  (One-Way ANOVA).

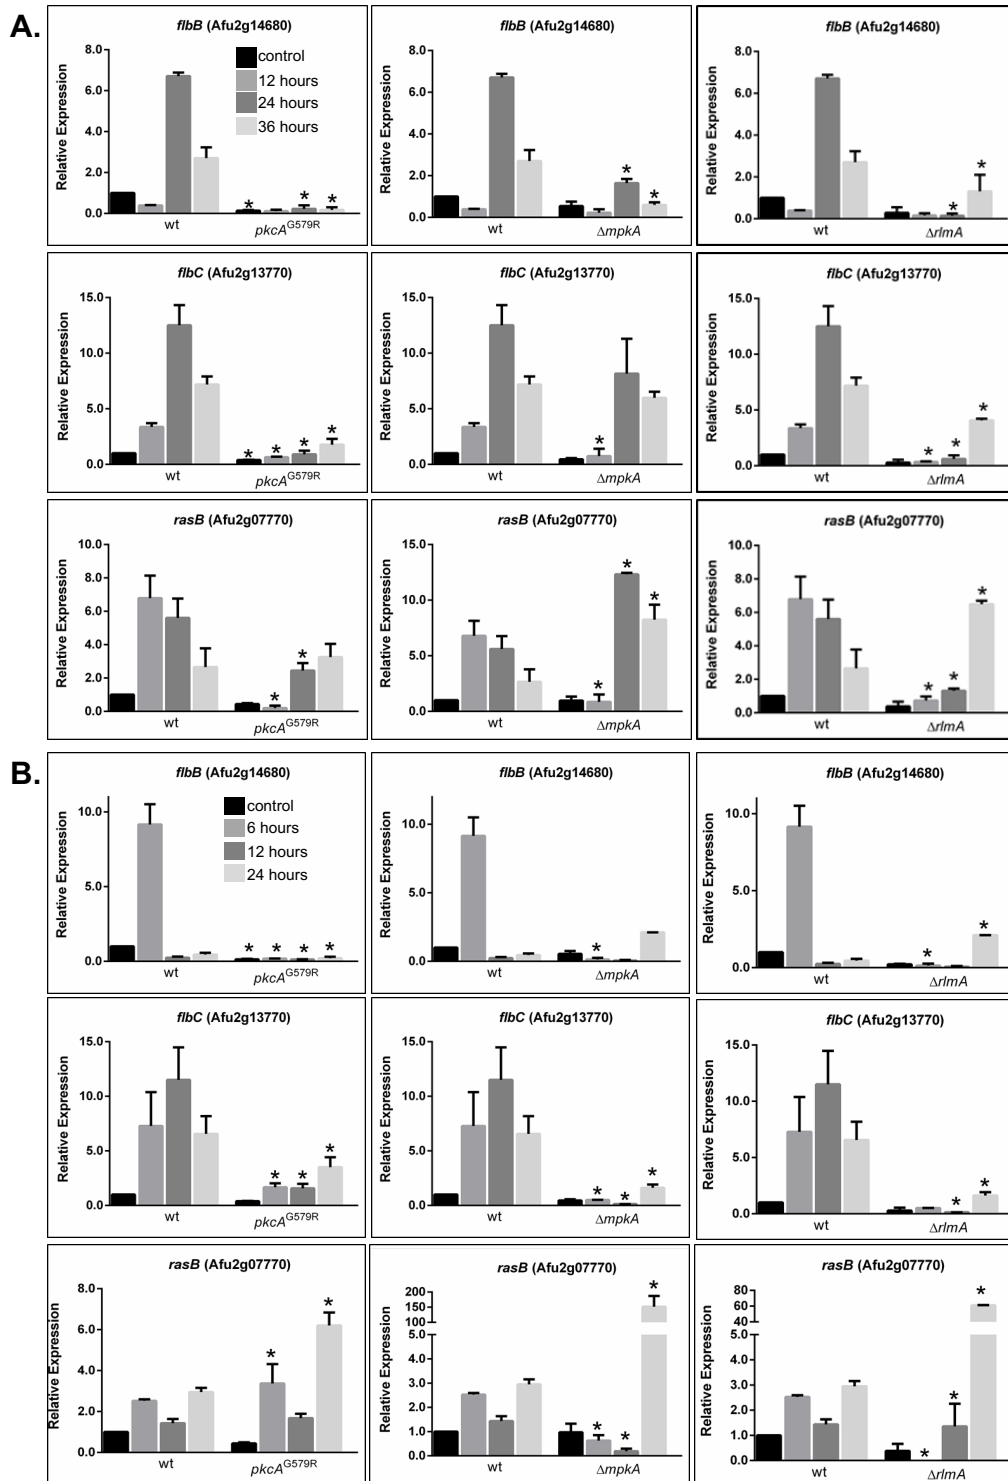

**FIG S7** CWIP genes are required for the expression of *flbB* and *flbC*. Total RNA was isolated from the strains subjected to synchronized asexual differentiation at 30°C (A) or 37°C (B). cDNA was obtained and used in RT-qPCR. The fold increase in each strain represents the normalized mRNA abundance relative to the wild-type strain. The data represent the average value of at least three independent experiments (with 2 technical repetitions each). \* $p \leq 0.05$  (One-Way ANOVA).

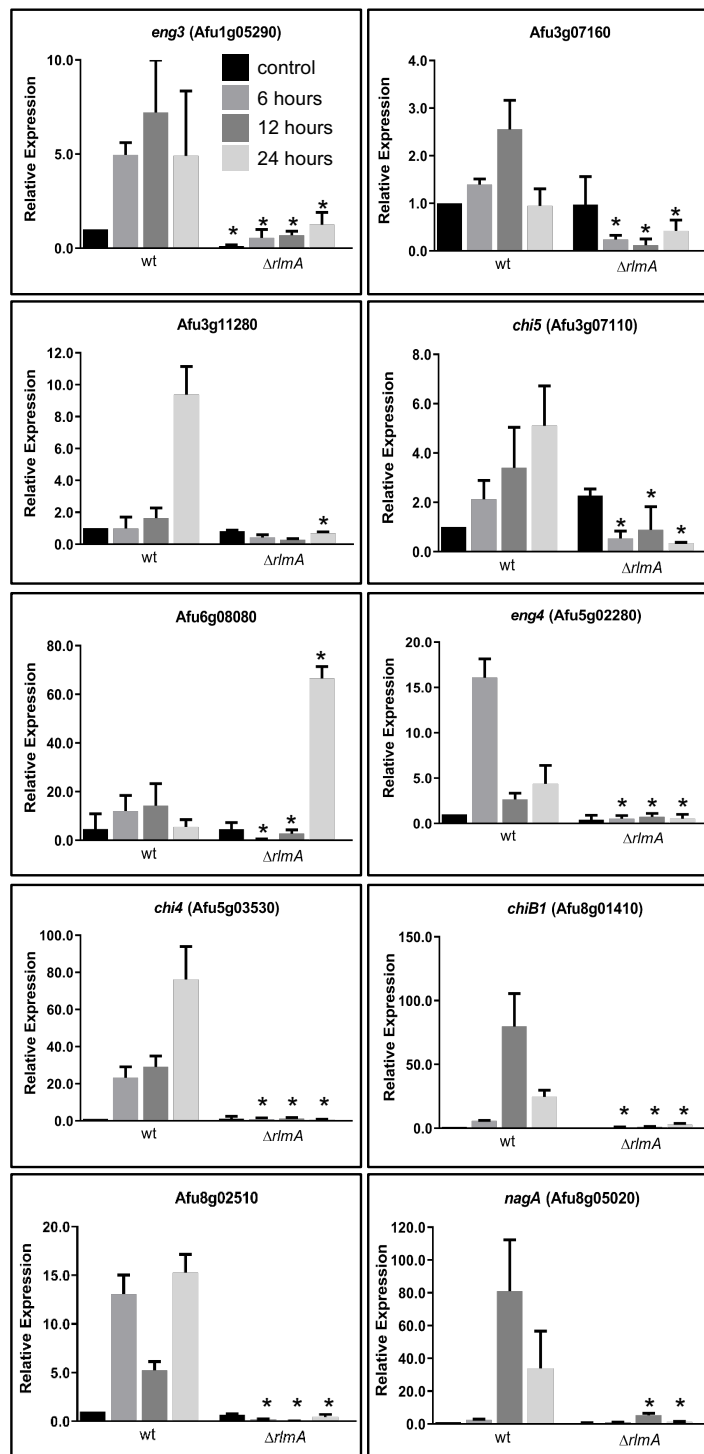

**FIG S8** RlmA is required for the expression of genes involved in glucan and chitin metabolism. Total RNA was isolated from the wild-type and  $\Delta rlmA$  strains subjected to synchronized asexual differentiation at 37°C. cDNA was obtained and used in RT-qPCR. The fold increase in each strain represents the normalized mRNA abundance relative to the wild-type strain. The data represent the average value of at least three independent experiments (with 2 technical repetitions each). \* $p \leq 0.05$  (One-Way ANOVA).

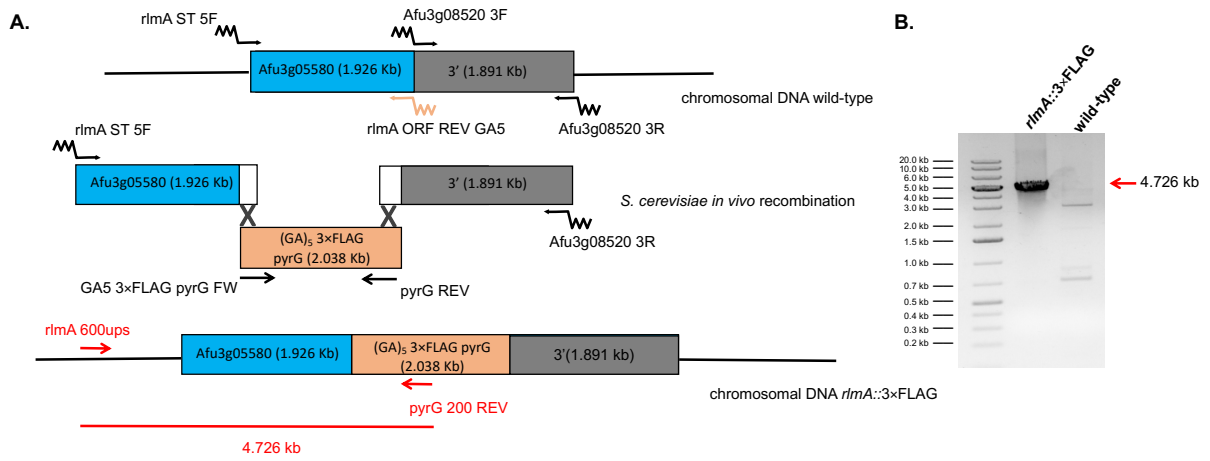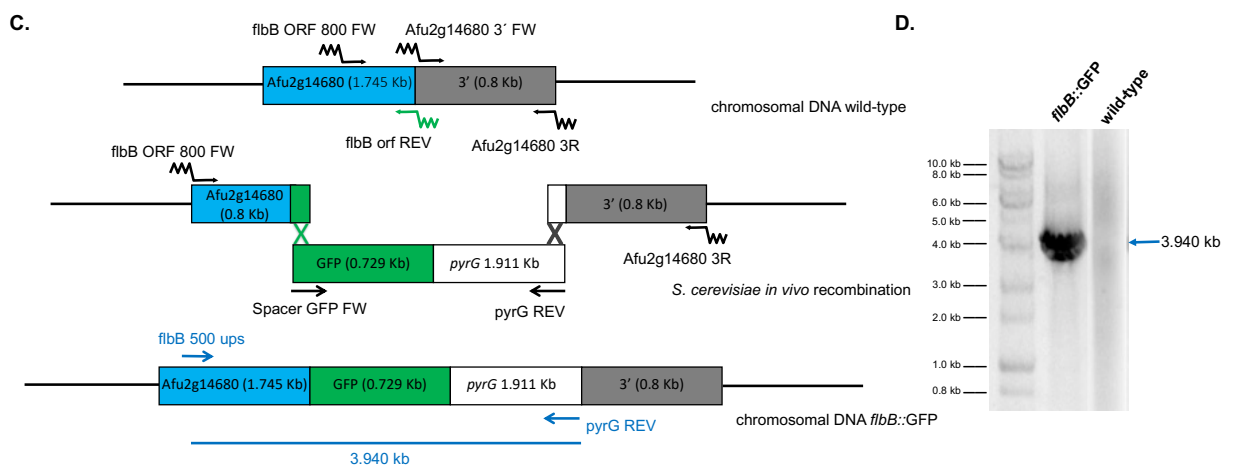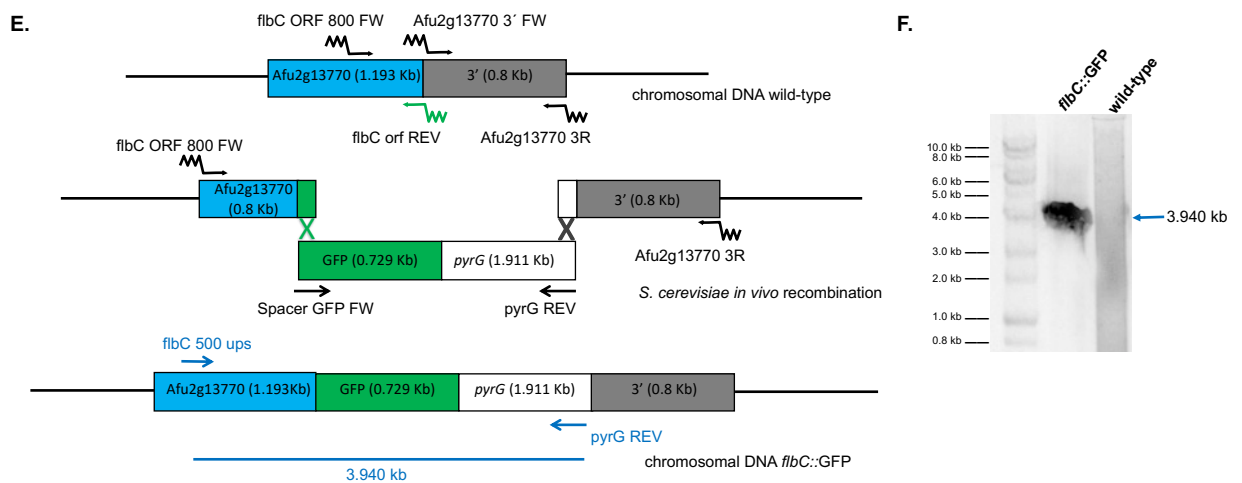

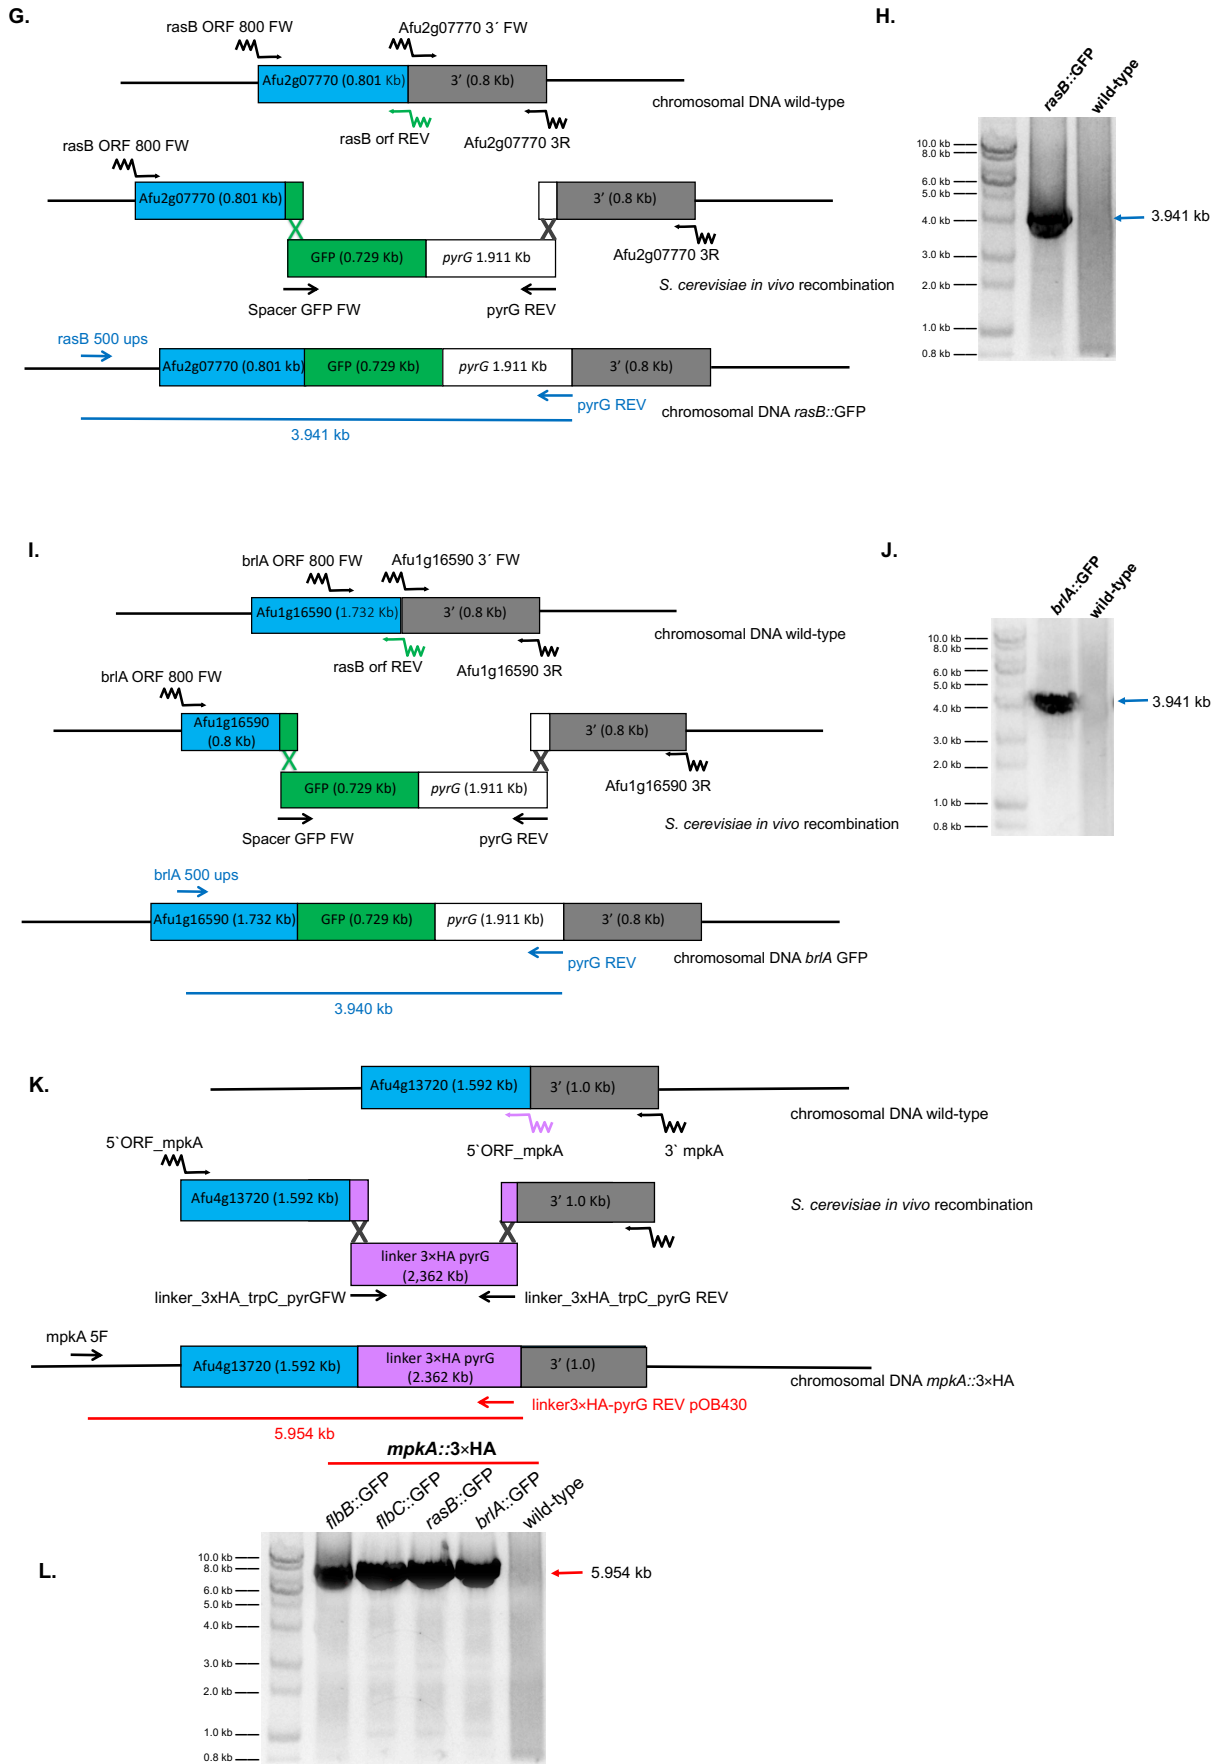

**FIG S9** Graphical representation of the substituted loci for the *A. fumigatus* C-terminal GFP, 3xHA and 3xFLAG tagged strains. The genes of interest and their flanking regions are



shown in blue and grey boxes, respectively. (A) Gene replacement strategy for the *rlmA::3×FLAG* strain construction. The *rlmA* genomic sequence without stop codon was cloned in-frame with the 3×FLAG in a C-terminal fusion separated by a (GA)<sub>5</sub> linker. The *pyrG* gene was used as a prototrophy marker. The *rlmA::3×FLAG* cassette was transformed into the *A. fumigatus* wild-type strain. (B) Transformants were validated by PCR with primer set *rlmA* 600 ups and *pyrG* 200 REV to confirm the *rlmA* locus replacement by the amplification of the 4.726 kb band in the mutant strain. (C, E, G, I) Gene replacement strategy for *flbB::GFP mpkA::3×HA*, *flbC::GFP mpkA::3×HA*, *rasB::GFP mpkA::3×HA* and *brlA::GFP mpkA::3×HA* strains construction. Fragments spanning 0.8 kb of 3' region of *flbB*, *flbC*, *rasB* and *brlA* genomic sequences (without stop codon) were individually cloned in-frame with the green fluorescent protein (GFP) gene in a C-terminal fusion separated by a Gly-Thr-Arg-Gly linker. Each cassette was transformed into the *A. fumigatus* wild-type strain. (D, F, H, J). Transformants were validated by PCR with primer set *flbB*, *flbC*, *rasB*, *brlA*, (located 500 bp upstream from the start of substitution cassette) and *pyrG* REV to confirm each locus replacement (blue lines). (K) The *mpkA::3×HA::ptrA* cassette was amplified from the plasmid pUC19-*mpkA::3×HA* and used to transform each GFP fused strain described in C-J. (L) The pyrithiamine-resistant transformants were selected and validated by PCR with primers *mpkA* 5F and *prtA* 3R to confirm the *mpkA* locus replacement by the amplification of the 5.954 kb band in the double tagged strains.

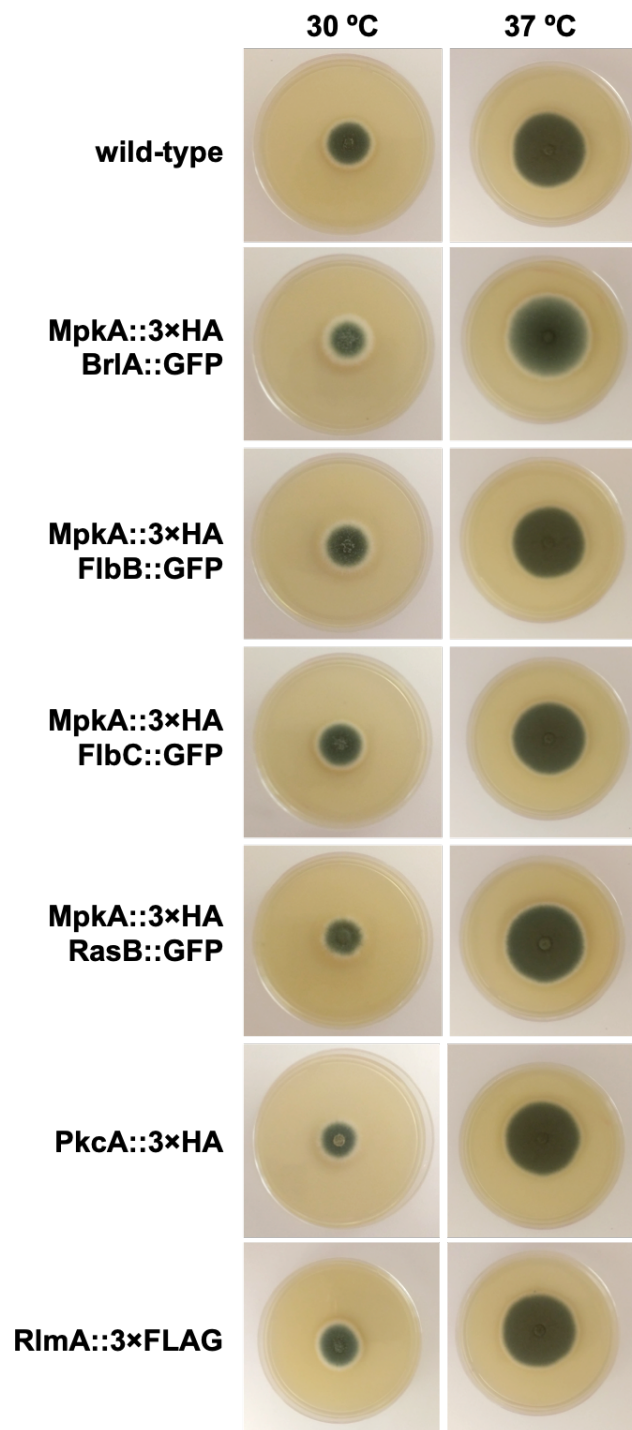

**FIG S10** Growth phenotype of the double-tagged strains.  $1 \times 10^5$  conidia were inoculated on YG medium and incubated at the indicated temperature for three days and photographed.

**TABLE S1** Primers used in this study for strains construction

| Primer*       | Sequence (5'→3')                                                 | Systematic name |
|---------------|------------------------------------------------------------------|-----------------|
| Afu3g08520 5F | gtaacgccagggtttcccagtcacgacgCTTGCTTGCTTGCTTGCTT'                 | Afu3g08520      |
| Afu3g08520 5R | <u>GCATCAGTGCCTCCTCTCAGACAGAATTCCGCAGTAAACAAGGAAC</u><br>ACCACG' |                 |
| pyrG FW       | GGAATTCTGTCTGAGAGGAGGC                                           | Afu2g08360      |
| pyrG REV      | GATATCGAATTCGCCTCAAAC                                            |                 |
| Afu3g08520 3F | <u>AAGAGCATTGTTTGAGGCGAATTCGATATCACTTTCTTGAATATTGC</u><br>GATGG  | Afu3g08520      |
| Afu3g08520 3R | gcgataacaatttcacacaggaacagcTCAGCGTCCGGTAAGTTG                    |                 |
| rlmA ST 5F    | gtaacgccagggtttcccagtcacgacgATGGGTCGAAGAAAGATCGA                 | Afu3g08520      |
| rlmA ORF REV  | <u>AGTTCTTCTCCTTTACTCATTCCCCGTGTTCCCGTCTTGGATTTCTTC</u><br>GCC   |                 |
| rlmA 600 ups  | GAATGAGAAGAAAGGAGGAATGA                                          |                 |
| MpkA_5'_FW    | CTCATTCTTGTCTGATGCG                                              | Afu4g13720      |
| MpkA_3'_REV   | GACTGTCGAGAAATCCGCTT                                             |                 |
| mpkA 600 ups  | GAGCCCTGACTTCACTGCA                                              |                 |
| flbC 500 ups  | TCAACACACTTGAACCGTGG                                             | Afu2g13770      |
| flbC 800 FW   | gtaacgccagggtttcccagtcacgacgACTTATGCGCCGATCAGCTA                 |                 |
| flbC ORF REV  | <u>AGTTCTTCTCCTTTACTCATTCCCCGTGTTCCCTCCTCCTCGCCACC</u><br>AGATA  |                 |
| flbC 3F       | AAGAGCATTGTTTGAGGCGAATTCGATATCAAAGCCCGTTCTCTACT<br>CTG           |                 |
| flbC 3R       | gcgataacaatttcacacaGAAACAGCCAAGATGACTCCAGACATTC                  |                 |
| flbB 500 ups  | TGAAAACCCCCACTTCAATG                                             | Afu2g14680      |
| flbB 800 FW   | gtaacgccagggtttcccagtcacgacgCAGGCGCCGGCAGCACTAGC                 |                 |
| flbB ORF REV  | AGTTCTTCTCCTTTACTCATTCCCCGTGTTCCCGAGTACATCGTATC<br>GTCGC         |                 |
| flbB 3F       | AAGAGCATT <u>GTTTGAGGCGAATTCGATATC</u> TGTGATATCGGATACTT<br>CTT  |                 |
| flbB 3R       | gcgataacaatttcacacaGAAACAGCGTTTTTCTATTAAGGCTTAA                  |                 |
| rasB 500 ups  | ATCGACGAGCTTATACTGCG                                             | Afu2g07760      |
| rasB 800 FW   | gtaacgccagggtttcccagtcacgacgATGACGTTGTACAAATTGGT                 |                 |
| rasB ORF REV  | <u>AGTTCTTCTCCTTTACTCATTCCCCGTGTTCCCGAGGATGACGCACTT</u><br>GATGC |                 |
| rasB 3F       | AAGAGCATT <u>GTTTGAGGCGAATTCGATATC</u> GGAACACATTAGCATT<br>GCA   |                 |
| rasB 3R       | gcgataacaatttcacacaGAAACAGCAGGACTCGCAAGAACCGGGT                  |                 |
| brlA 500 ups  | TGAACTAGAAGATACAGAGG                                             | Afu1g16590      |
| brlA 800 FW   | gtaacgccagggtttcccagtcacgacgCTCCGTATTTCCCTGAATCGG                |                 |

|                           |                                                                                                                                                          |   |
|---------------------------|----------------------------------------------------------------------------------------------------------------------------------------------------------|---|
| brlA ORF REV              | <u>AGTTCTTCTCCTTTACTC</u> ATTCCCCGTGTTCCCTCATCCCATTCCATA<br>CTGA                                                                                         |   |
| brlA 3F                   | AAGAGCATT <u>GTTTGAGGCGAATTCGATATCA</u> AAAAAAAAAGACGAAAA                                                                                                |   |
| brlA 3R                   | AAG<br>gcgataacaattcacacaGAAACAGCGCGATTTCGTCCGTGTCATTT                                                                                                   |   |
| Spacer GFP FW             | <b>GGAACACGGGGA</b> ATGAGTAAAGGAGAAGAAGACTTTTCA                                                                                                          | - |
| GFP REV pyrG              | <u>GCATCAGTGCCTCCTCTCAGACAGAATTC</u> TTATTTGTATAGTTCAT<br>CCATGCCATG                                                                                     | - |
| GA5 3×FLAG pyrG FW        | <b>GGAGCTGGTGCAGGCGCTGGAGCCGGTGCC</b> GATTACAAGGATGAC<br>GACGATAAGGATTACAAGGATGACGACGATAAGGATTACAAGGATG<br>ACGACGATAAG <b>TAA</b> GGAATTCTGTCTGAGAGGAGGC | - |
| linker_3×HA_trpC_pyrG FW  | GGAGGTGGTAGCGGTGGT                                                                                                                                       |   |
| linker_3×HA_trpC_pyrG REV | CTGTCTGAGAGGAGGCACTGA                                                                                                                                    | - |

\* For primers location on each construction refer to Fig. S9.

Small letters indicate homology to the plasmid pRS426 flanking sequence for *in vivo* recombination in *S. cerevisiae*.

Underlined letters indicate homology to a fragment in the cassette.

Bold letters indicate the Gly-Thr-Arg-Gly linker separating *flbB*, *flbC*, *brlA* and *rasB* C-terminus and GFP start codon.

Red letters indicate the (GA)<sub>5</sub> linker and blue letters indicate the 3×FLAG peptide sequence followed by a stop codon (TAA) in bold.

**TABLE S2** RT-qPCR primers used in this study

| <b>Primer name</b>                  | <b>Sequence (5'→3')</b>                         | <b>Systematic name</b> |
|-------------------------------------|-------------------------------------------------|------------------------|
| <i>pkcA</i> FW<br><i>pkcA</i> REV   | CCGAAGTTCTGTTGGCTCTC<br>CAGAGACCGTAATCGGCAAT    | Afu5g11970             |
| <i>tubA</i> FW<br><i>tubA</i> REV   | TTCCAACAACATCCAGACC<br>CGACGGAACATAGCAGTGAA     | Afu1g10910             |
| <i>rlmA</i> FW<br><i>rlmA</i> REV   | GACGCCGATCTCTGCTCTAC<br>GGAGTGGGGAAGGTTAGAGG    | Afu3g08520             |
| <i>mpkA</i> FW<br><i>mpkA</i> REV   | GGCCATCAAGAAGGTTACCA<br>TGAAATTGTCTGGTCGTGGA'   | Afu4g13720             |
| <i>abaA</i> FW<br><i>abaA</i> REV   | GCACGACCTGTTGCATCAAA<br>GCGGTGGCGGGTACAA        | Afu1g04830             |
| <i>brlA</i> FW<br><i>brlA</i> REV   | TGCAAAGAACCTGGCTGCAA<br>AACCAGCAGACATGAGGCTT    | Afu1g16590             |
| <i>wetA</i> FW<br><i>wetA</i> REV   | CGAGATTCCCATGAGCGTAAA<br>GGAAGGGCGCATCAAGCT     | Afu4g13230             |
| <i>flbB</i> FW<br><i>flbB</i> REV   | TCCCCACGCACGAAAT<br>CGAAGCCGTCATGGCAAT          | Afu2g14680             |
| <i>flbC</i> FW<br><i>flbC</i> REV   | TGGACTTCTGCACACACGTCTT<br>CCCATGGAAGTTGCGTACACT | Afu2g13770             |
| <i>rasB</i> FW<br><i>rasB</i> REV   | TGTCGTTTCGCATGCTCCGACA<br>CCAAGCCAGTCGGTCGACG   | Afu2g07770             |
| <i>chiB1</i> FW<br><i>chiB1</i> REV | GAATCGCTGCCTTATCTCTT<br>AGCGTCGCTCCCTGGTCAAG    | Afu8g01410             |
| Afu3g07160 FW<br>Afu3g07160 REV     | CTTCAAATATAACTAGCTC<br>AAGACCGACGGCTCTGAGGT     | Afu3g07160             |
| Afu3g11280 FW<br>Afu3g11280 REV     | CGTCTATCACTGTCCTTGCT<br>AGATAGGATGAAAGAGACT     | Afu3g11280             |
| <i>nagA</i> FW<br><i>nagA</i> REV   | ATCCGCTGCCTCATCTTCCA<br>GACCCCTTTTCCAACGCTTG    | Afu8g05020             |
| <i>chi5</i> FW<br><i>chi5</i> REV   | AAGGGGCCGCTTGTATATTA<br>AGGTGCCAACCTTGGCAAAA    | Afu3g07160             |
| <i>chi4</i> FW<br><i>chi4</i> REV   | CGATTCTGGGCGGCTGCACT<br>GGAAAGAATCAATGACAACT    | Afu5g03530             |
| <i>chi5</i> FW<br><i>chi5</i> REV   | GGAATCCGTAGGTATCTGGC<br>GAATACAATACCGAACCAGT    | Afu3g07110             |
| <i>eng3</i> FW<br><i>eng3</i> REV   | GACCCCTTTTCCAACGCTTG<br>ACAGCGGCTTGGATCAATCA    | Afu1g05290             |
| <i>eng4</i> FW<br><i>eng4</i> REV   | TATATGCTGGCTGCTGTGCC<br>ATGCCTCATCAGCGCTTGGG    | Afu5g02280             |
| Afu6g08080 FW<br>Afu6g08080 REV     | TAGAACCAGCGAATTTTTC<br>AGAAGTCCAATGAACGCACC     | Afu6g08080             |

**TABLE S3** ChIP-qPCR primers used in this study

| <b>Primers</b>   | <b>Sequence (5'→3')</b>      | <b>Systematic name</b> |
|------------------|------------------------------|------------------------|
| <i>flbB</i> FW   | CTCTTATTCTTTGTGGCCCTCTCT     | Afu2g14680             |
| <i>flbB</i> REV  | GAGCTCAAGGAACGAGATTATTTTAA   |                        |
| <i>flbC</i> FW   | CAAGATGAAAGAAGAAAAAGAAGCAGTT | Afu2g13770             |
| <i>flbC</i> REV  | CCTTTCGATTACTGTGTGCAAGTT     |                        |
| <i>abaA</i> FW   | GCTGGAACCTCGTTATACATGAATGTG  | Afu1g04830             |
| <i>abaA</i> REV  | GACACCAAGTCGCTCGGCCACCGAAG   |                        |
| <i>brlA</i> FW   | AAATGCTCCGAAGACAAGAAAC       | Afu1g16590             |
| <i>brlA</i> REV  | CTCTTTTCTTTTTTGGATTAAATTCCTT |                        |
| <i>rasB</i> FW   | CGAGCTTATACTGCGACCGG         | Afu2g07770             |
| <i>rasB</i> REV  | AGAGACATGACATACCTTTG         |                        |
| <i>chiB1</i> FW  | GAATCGCTGCCTTATCTCTT         | Afu8g01410             |
| <i>chiB1</i> REV | AGCGTCGCTCCCTGGTCAAG         |                        |
| Afu3g07160 FW    | CTTCAAATATAACTAGCTC          | Afu3g07160             |
| Afu3g07160 REV   | AAGACCGACGGCTCTGAGGT         |                        |
| Afu3g11280 FW    | CGTCTATCACTGTCCTTGCT         | Afu3g11280             |
| Afu3g11280 REV   | AGATAGGATGAAAGAGACT          |                        |
| <i>nagA</i> FW   | CGATTCTGGGCGGCTGCACT         | Afu8g05020             |
| <i>nagA</i> REV  | GGAAAGAATCAATGACAACCT        |                        |
| <i>chi5</i> FW   | AAGGGGCCGCTTGTATATTA         | Afu3g07160             |
| <i>chi5</i> REV  | AGGTGCCAACCTTGGCAAAA         |                        |
| <i>chi4</i> FW   | ATTCCGTTACATAAAATATG         | Afu5g03530             |
| <i>chi4</i> REV  | AGTGCTCTACATATTGTCAG         |                        |
| <i>chi5</i> FW   | CCGCGAGTTCGTCAAGCTAC         | Afu3g07110             |
| <i>chi5</i> REV  | ATCCGCTGCCTCATCTTCCA         |                        |
| <i>eng3</i> FW   | GACCCCTTTTCCAACGCTTG         | Afu1g05290             |
| <i>eng3</i> REV  | ACAGCGGCTTGGATCAATCA         |                        |
| <i>eng4</i> FW   | GTATGAAATTCATCCAGTGT         | Afu5g02280             |
| <i>eng4</i> REV  | AGCAATGGATGTACTGTGTG         |                        |
| Afu6g08080 FW    | TAGAACCCAGCGAATTTTTC         | Afu6g08080             |
| Afu6g08080 REV   | AGAAGTCCAATGAACGCACC         |                        |
| <i>prxB</i> FW   | CTCTACTGCCCTGACTTCG          | Afu5g15070             |
| <i>prxB</i> REV  | GGGTGGGAGAAGAGGATAGC         |                        |
